# Supplementary material
Source: PubMed Central journal article supplement (PMC3953693)

## SUPPLEMENTARY INFORMATION

### Supplementary Methods

**Animals.** Indirect calorimetry was performed in PhenoMaster cages (TSE Systems, Bad Homburg, Germany) with individually housed mice at 22°C. Calculations of resting metabolic rate (RMR) and body-weight-adjusted oxygen consumption were performed as described (Tschop et al, 2011). All mice were maintained on a 12 hr light/dark cycle at 24 C with regular unrestricted diet unless stated otherwise.

**Human VLDL clearance.** Human VLDL was isolated from fasting serum samples by ultracentrifugation as described (Redgrave et al, 1975). Briefly, 3.5 ml serum was put in a SW40Ti polyallomer tube and mixed with 1.39 g KBr, overlayers with 332.8 ml of a NaCl/KBr solution (D = 1.063, 1.019, and 1.006 g/ml) and run for 18 hr at 40,000 rpm. Human VLDL (20 mg) was injected into each animal, and serum samples were taken at 2, 10, 30, 60, and 120 min. Serum human ApoB-100 levels were measured using a human-specific ApoB ELISA. For the ELISA, we used a primary coating antibody generated against human apoB-100 (mAb47, kindly supplied by J. Witztum, University of San Diego, USA), in a concentration of 2 mg/well IgG protein in TBS/EDTA/BHT and a secondary biotinylated polyclonal antibody raised in goat against human ApoB in a concentration of 4 ug/well in 1.5% BSA/TBS/0.1% Tween. To prevent nonspecific binding, plates were blocked with 1.5% BSA/TBS/0.1% Tween. Samples were diluted 1:25. Absorbance was

read 30 min after addition of TMB and termination of the reaction with 2 M H<sub>2</sub>SO<sub>4</sub> at 450 nm (Groot et al, 1991).

**Trichloric acid / Acetone Protein Precipitation.** For precipitation of protein from FPLC fraction, 200 µl of FPLC fractions 35-37 was mixed with 1.6 ml ice cold acetone and 200 µl trichloric acid (100% w/v). The mix was kept at -20°C for 1 h for precipitation. Then, the mix was centrifuged at 11500 rpm for 15 min at 4°C. The pellet was washed 4 times with 1 ml ice-cold acetone and centrifuged for 15 min at 4°C. The acetone was removed and the pellet air dried. The pellet was resuspended in loading buffer and subjected to Western Blot analysis.

### Supplementary References

Groot PH, van Stiphout WA, Krauss XH, Jansen H, van Tol A, van Ramshorst E, Chin-On S, Hofman A, Cresswell SR, Havekes L (1991) Postprandial lipoprotein metabolism in normolipidemic men with and without coronary artery disease. *Arterioscler Thromb* **11**(3): 653-662

Redgrave TG, Roberts DC, West CE (1975) Separation of plasma lipoproteins by density-gradient ultracentrifugation. *Anal Biochem* **65**(1-2): 42-49

Tschop MH, Speakman JR, Arch JR, Auwerx J, Bruning JC, Chan L, Eckel RH, Farese RV, Jr., Galgani JE, Hambly C, Herman MA, Horvath TL, Kahn BB, Kozma SC, Maratos-Flier E, Muller TD, Munzberg H, Pfluger PT, Plum L, Reitman ML, Rahmouni K, Shulman GI, Thomas G, Kahn CR, Ravussin E (2011) A guide to analysis of mouse energy metabolism. *Nat Methods* **9**(1): 57-63

## Supplementary Figure Legends

**Supplementary Figure 1.** (a) Quantitative PCR analysis of TSC22D1 expression from liver extracts from control or TSC22D1 shRNA adenovirus injected wild-type C57BL/6J mice. (b) Representative Western Blot of liver extracts from same mice as in a, using TSC22D1 (D1) or actin specific antibodies, (c) body weight, (d) liver weight, (e) abdominal fat weight, (f) liver triglycerides. (Representative cryosections stained with Oil Red O), (g) serum non-esterified fatty acids (NEFA), (h) serum ketone bodies, (i) blood glucose, (j) serum TG, for refed mice, levels for fasted mice were not detectable, (k) mean VO<sub>2</sub>, as determined by indirect calorimetry. (l) respiratory exchange ratio as determined by indirect calorimetry, (m) Quantification of Western Blot of liver extracts from control or TSC22D1 cDNA adenovirus injected wild-type C57BL/6J mice using TSC22D1 (D1) or actin specific antibodies. Western Blot was quantified with ImageJ. (n) Quantitative qPCR analysis of TSC22D1 expression in liver, abdominal fat (abd), inguinal fat (ing), kidney or gastrocnemius muscle (GC) in the fasted state in same mice as in m. (o) Liver cholesterol levels of same mice as in m. (p) Body weight of 24 h fasted or 6 h refed control or TSC22D1 cDNA adenovirus injected wild-type C57BL/6J mice, (q) liver triglycerides, (r) liver weight, (s) blood glucose, (t) serum non-esterified fatty acids (NEFA), (u) serum ketone bodies, (v) serum triglycerides (TG). Statistical tests student's t-test. \*, p<0.05, \*\*, p<0.01

**Supplementary Figure 2:** (a) Quantitative qPCR analysis of TSC22D1 expression in liver, abdominal fat (abd), inguinal fat (ing), kidney or gastrocnemius muscle (GC) in the fasted state in of refeed control or miRNA TSC22D1 adeno-associated virus injected wild-type C57BL/6N (b) Liver cholesterol of same mice as in a, (c) serum triglycerides (TG), (d) body weight, (e) liver weight, (f) blood glucose, (g) serum non-esterified fatty acids (NEFA) in same mice as in a. (means $\pm$ SEM, n=5), Statistical tests student's t-test

**Supplementary Figure 3.** (a) Quantitative PCR analysis of hepatic TSC22D1 of control or TSC22D1 shRNA adenovirus injected wild-type C57BL/6J mice. (b) Clearance of human ApoB from serum of control or TSC22D1 shRNA adenovirus injected wild-type C57BL/6J mice. 20 mg of human VLDL were injected into each animal and serum samples were taken at the indicated time points. Human ApoB levels were determined by human-specific ELISA (means $\pm$ SEM, n=6). (c) Western Blot of liver extracts from control or TSC22D1 shRNA adenovirus injected wild-type C57BL/6J mice using Apolipoprotein A1 (ApoA1) or valosin containing protein (VCP) specific antibodies. (d) Western Blot of serum from same mice as in c, using ApoA1 specific antibody. (e) Western Blot of precipitated FPLC fractions 35-37 from same mice as in c, using ApoA1 antibody. (f) Quantification of Western Blot of liver extracts from mice fed a high-fat diet (HFD) compared to control mice on a low-fat diet (LFD), using TSC22D1 (D1) or actin specific antibodies. Western Blot was quantified with ImageJ. (g) Serum TGFbeta1 levels in wt and ob/ob mice. (h) Quantification of Western Blot of liver extracts from Balb/C mice treated with PBS or  $1.5 \times 10^6$  colon 26 (C26) cells over 3 weeks, using TSC22D1 (D1) or actin specific antibodies. Western Blot was quantified with ImageJ. (i) Relative lesion area in LDLRKO mice with or without streptozotocin treatment (STZ). The surface lesion area was quantified with ImageJ software. means $\pm$ SEM, n=5). Statistical test: student's t-test. \*, p<0.05

**Supplementary Figure 4.** (a) Liver cholesterol levels of 24 h fasted or 6 h refed control or miRNA TSC22D1 adeno-associated virus injected ob/ob mice, (b) body weight, (c) blood glucose, (d) liver weight, (e) serum non-esterified fatty acids (NEFA), (f) serum ketone bodies, (g) serum triglycerides (TG) in same mice as in a. (means $\pm$ SEM, n=5), Statistical tests student's t-test: \*, p<0.05

**Figure S1**

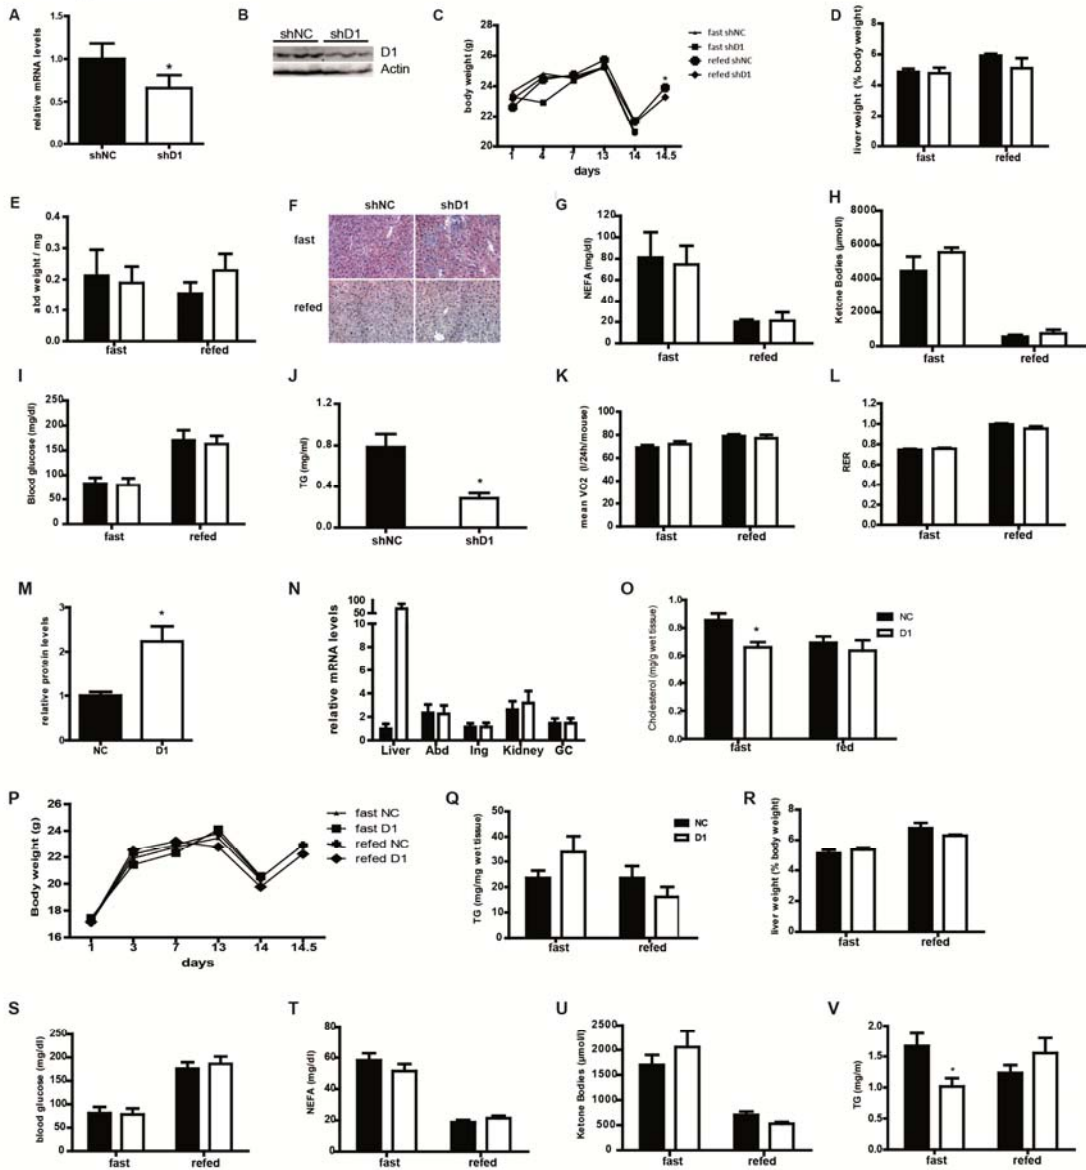



Figure S2

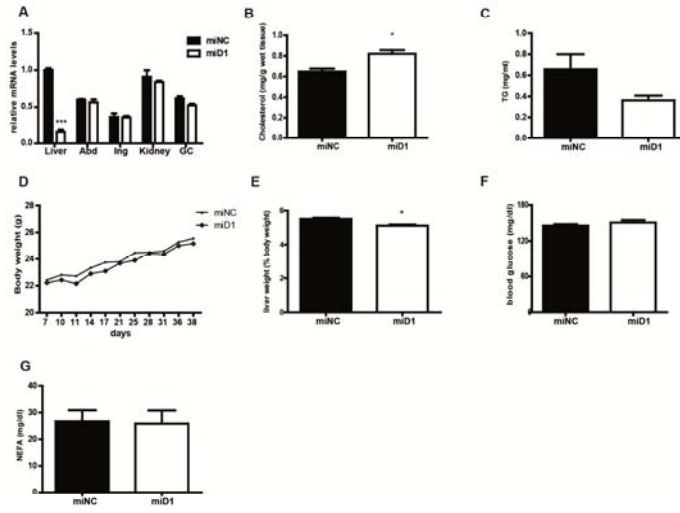

**Figure S3**

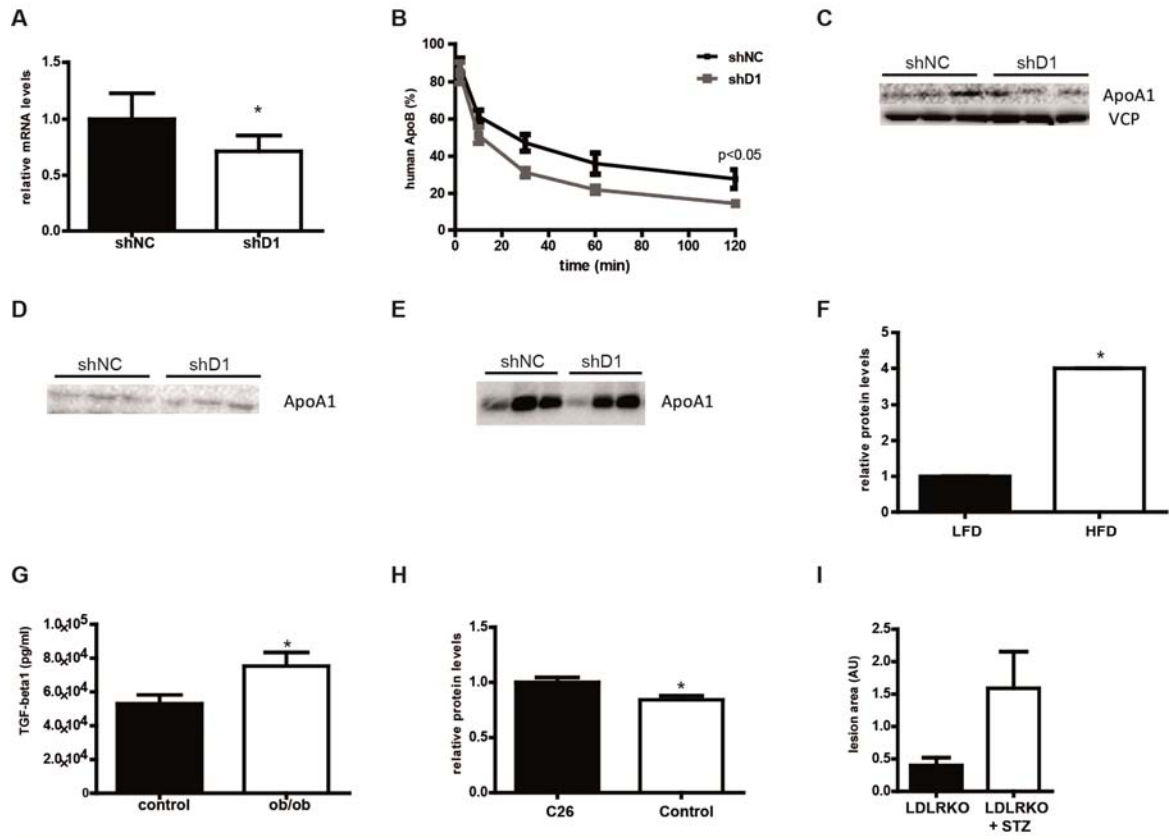

**Figure S4**

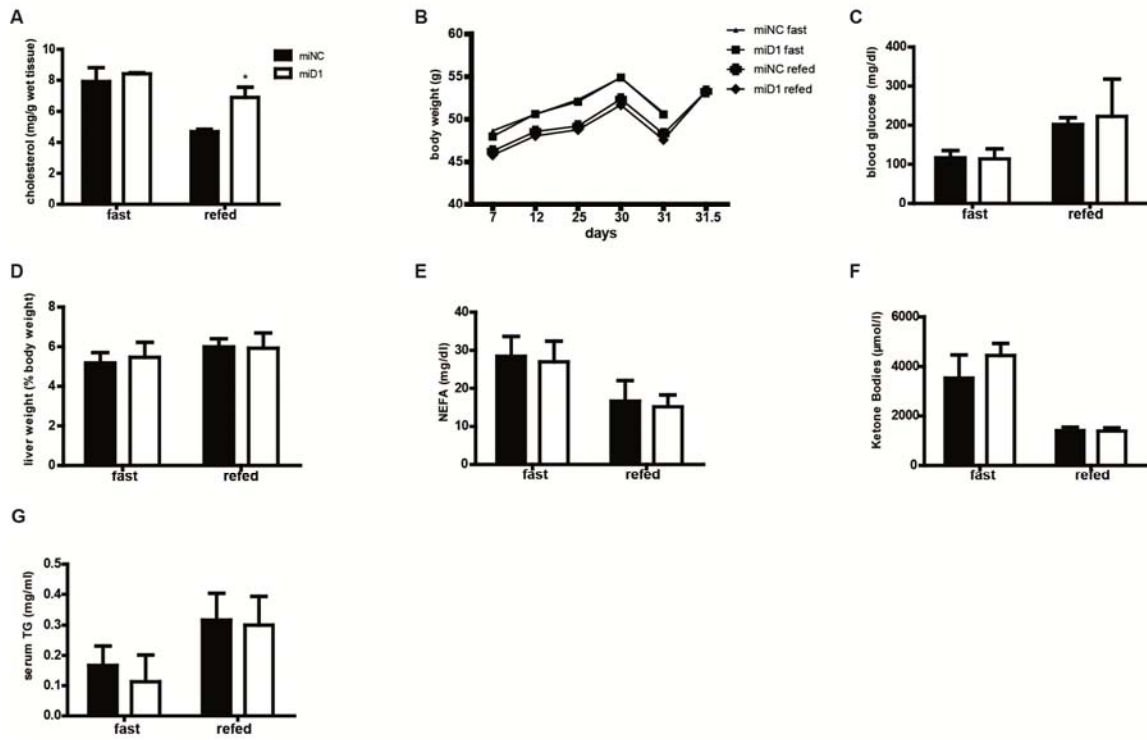

Supplement: mmc1.pdf [file mmc1.pdf]
